# Supplementary figures and images for: Temporal evolution of single-cell transcriptomes of Drosophila olfactory projection neurons
Source: eLife journal article supplement (doi:10.7554/elife.63450), 2021-01-11

Figure 5 supplement 1

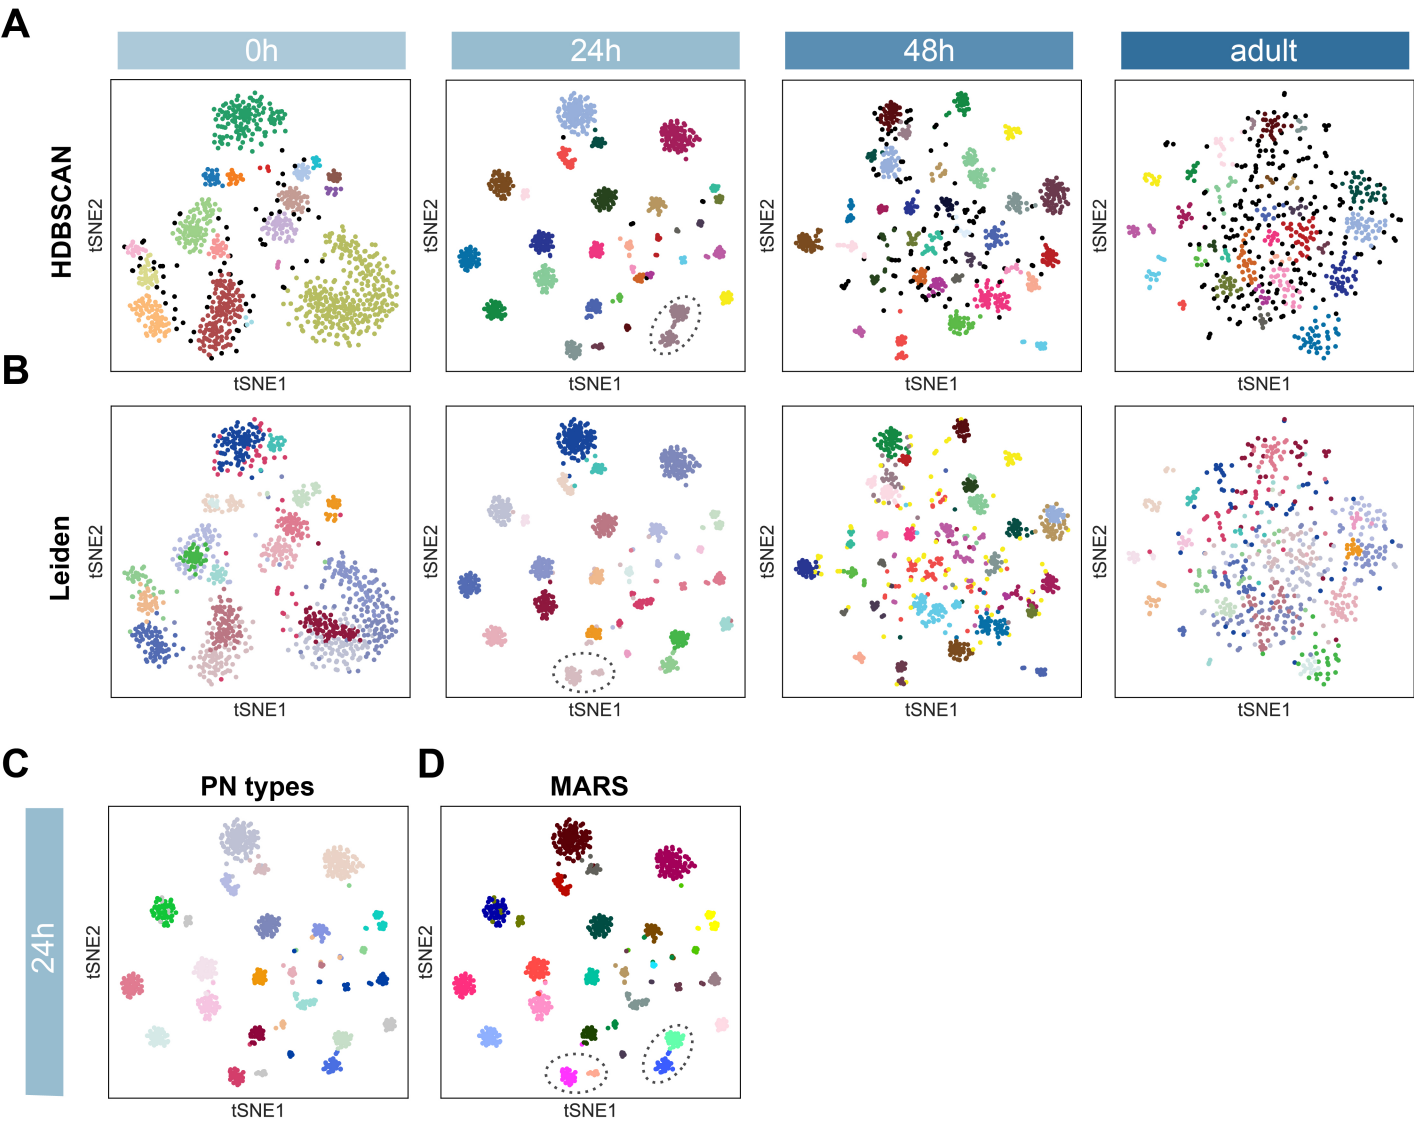

Supplement: supp [file elife-63450-supp-v1.zip]

Figure 7 supplement 2

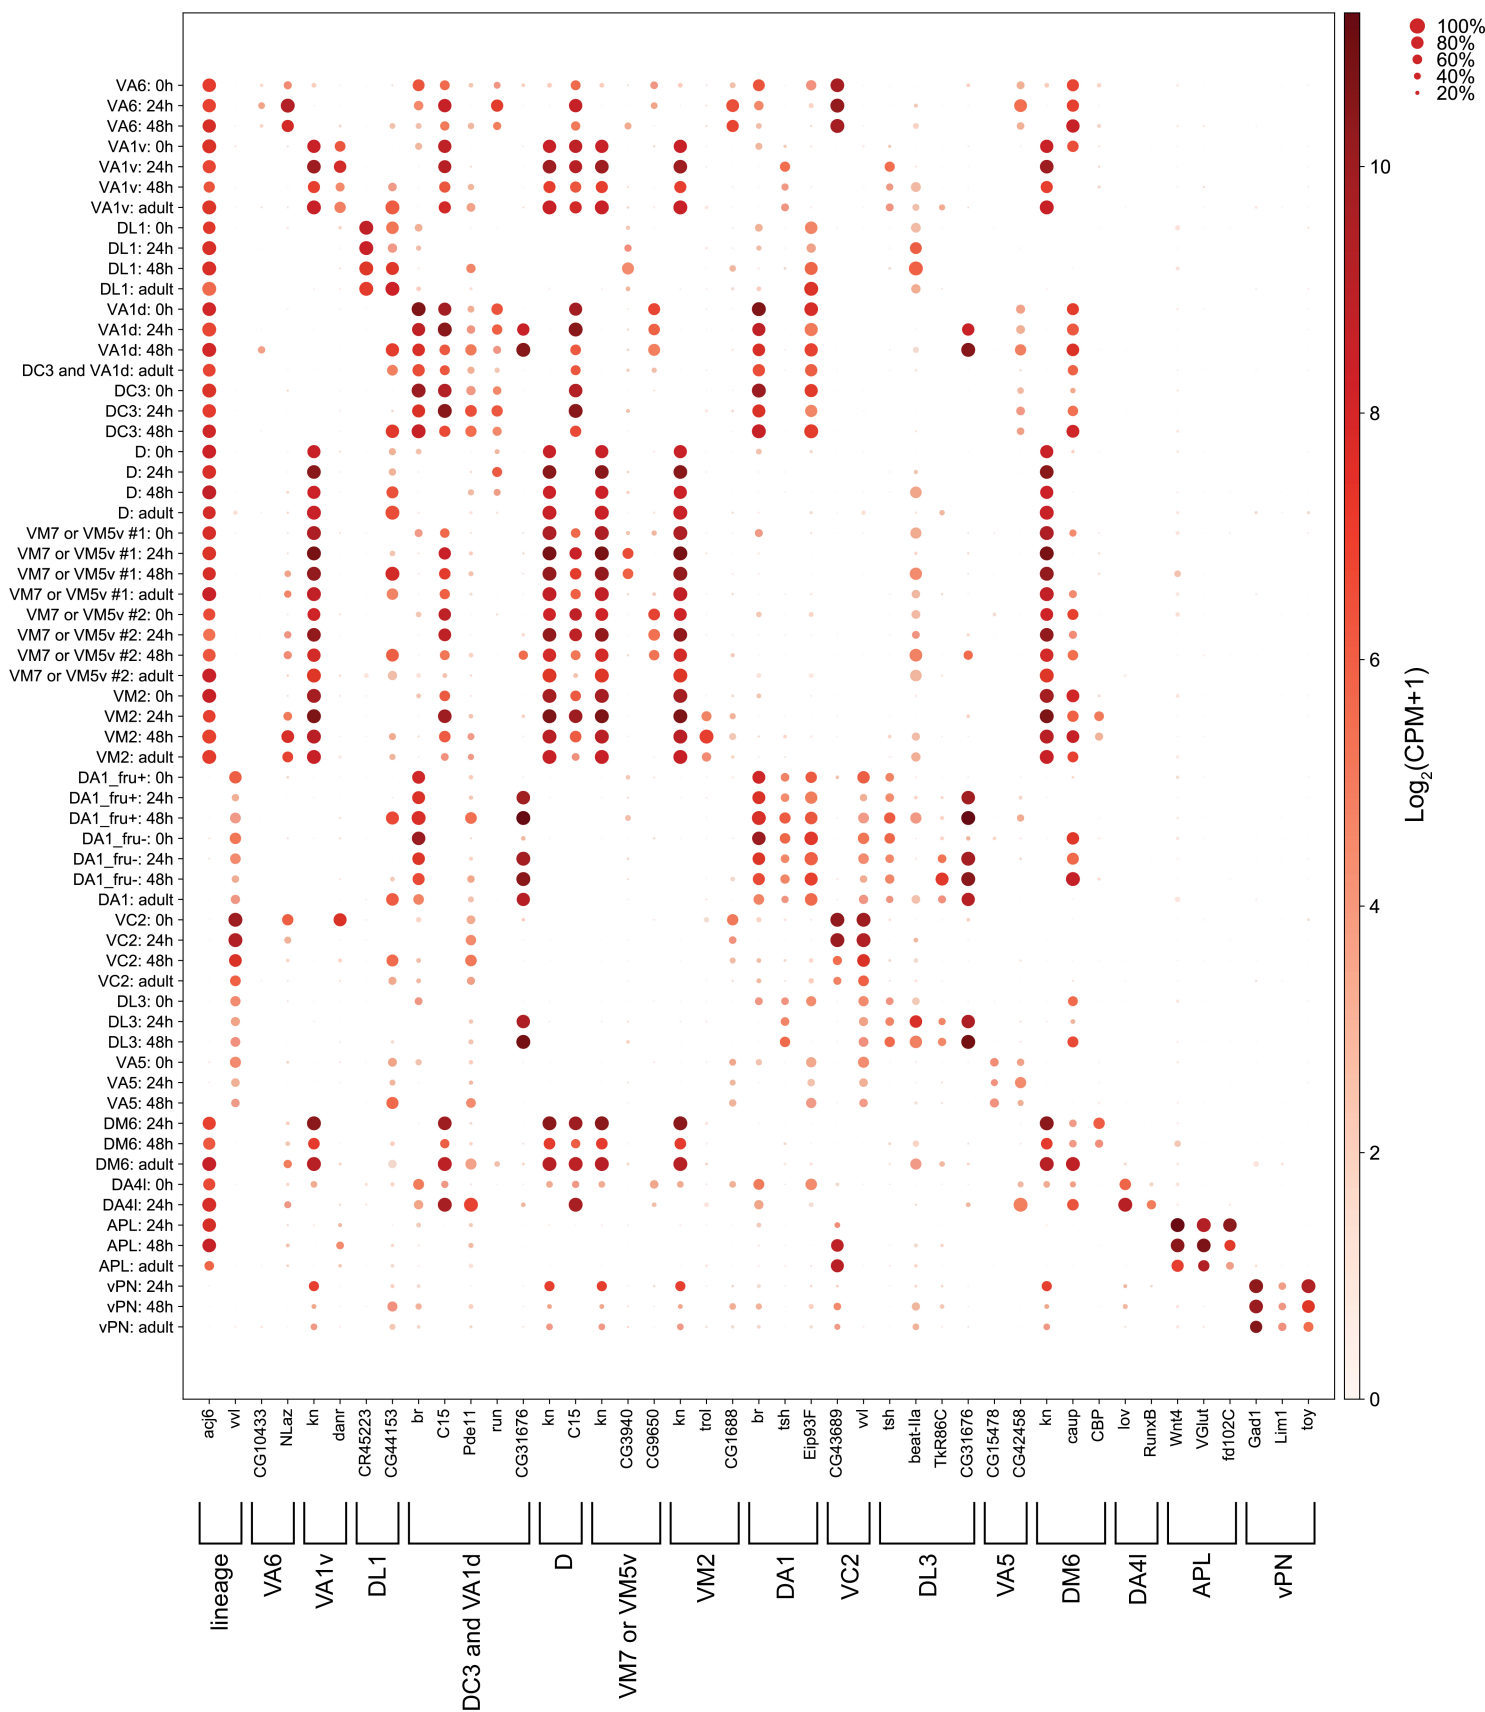

Supplement: supp [file elife-63450-supp-v1.zip]

Figure 2 supplement 2

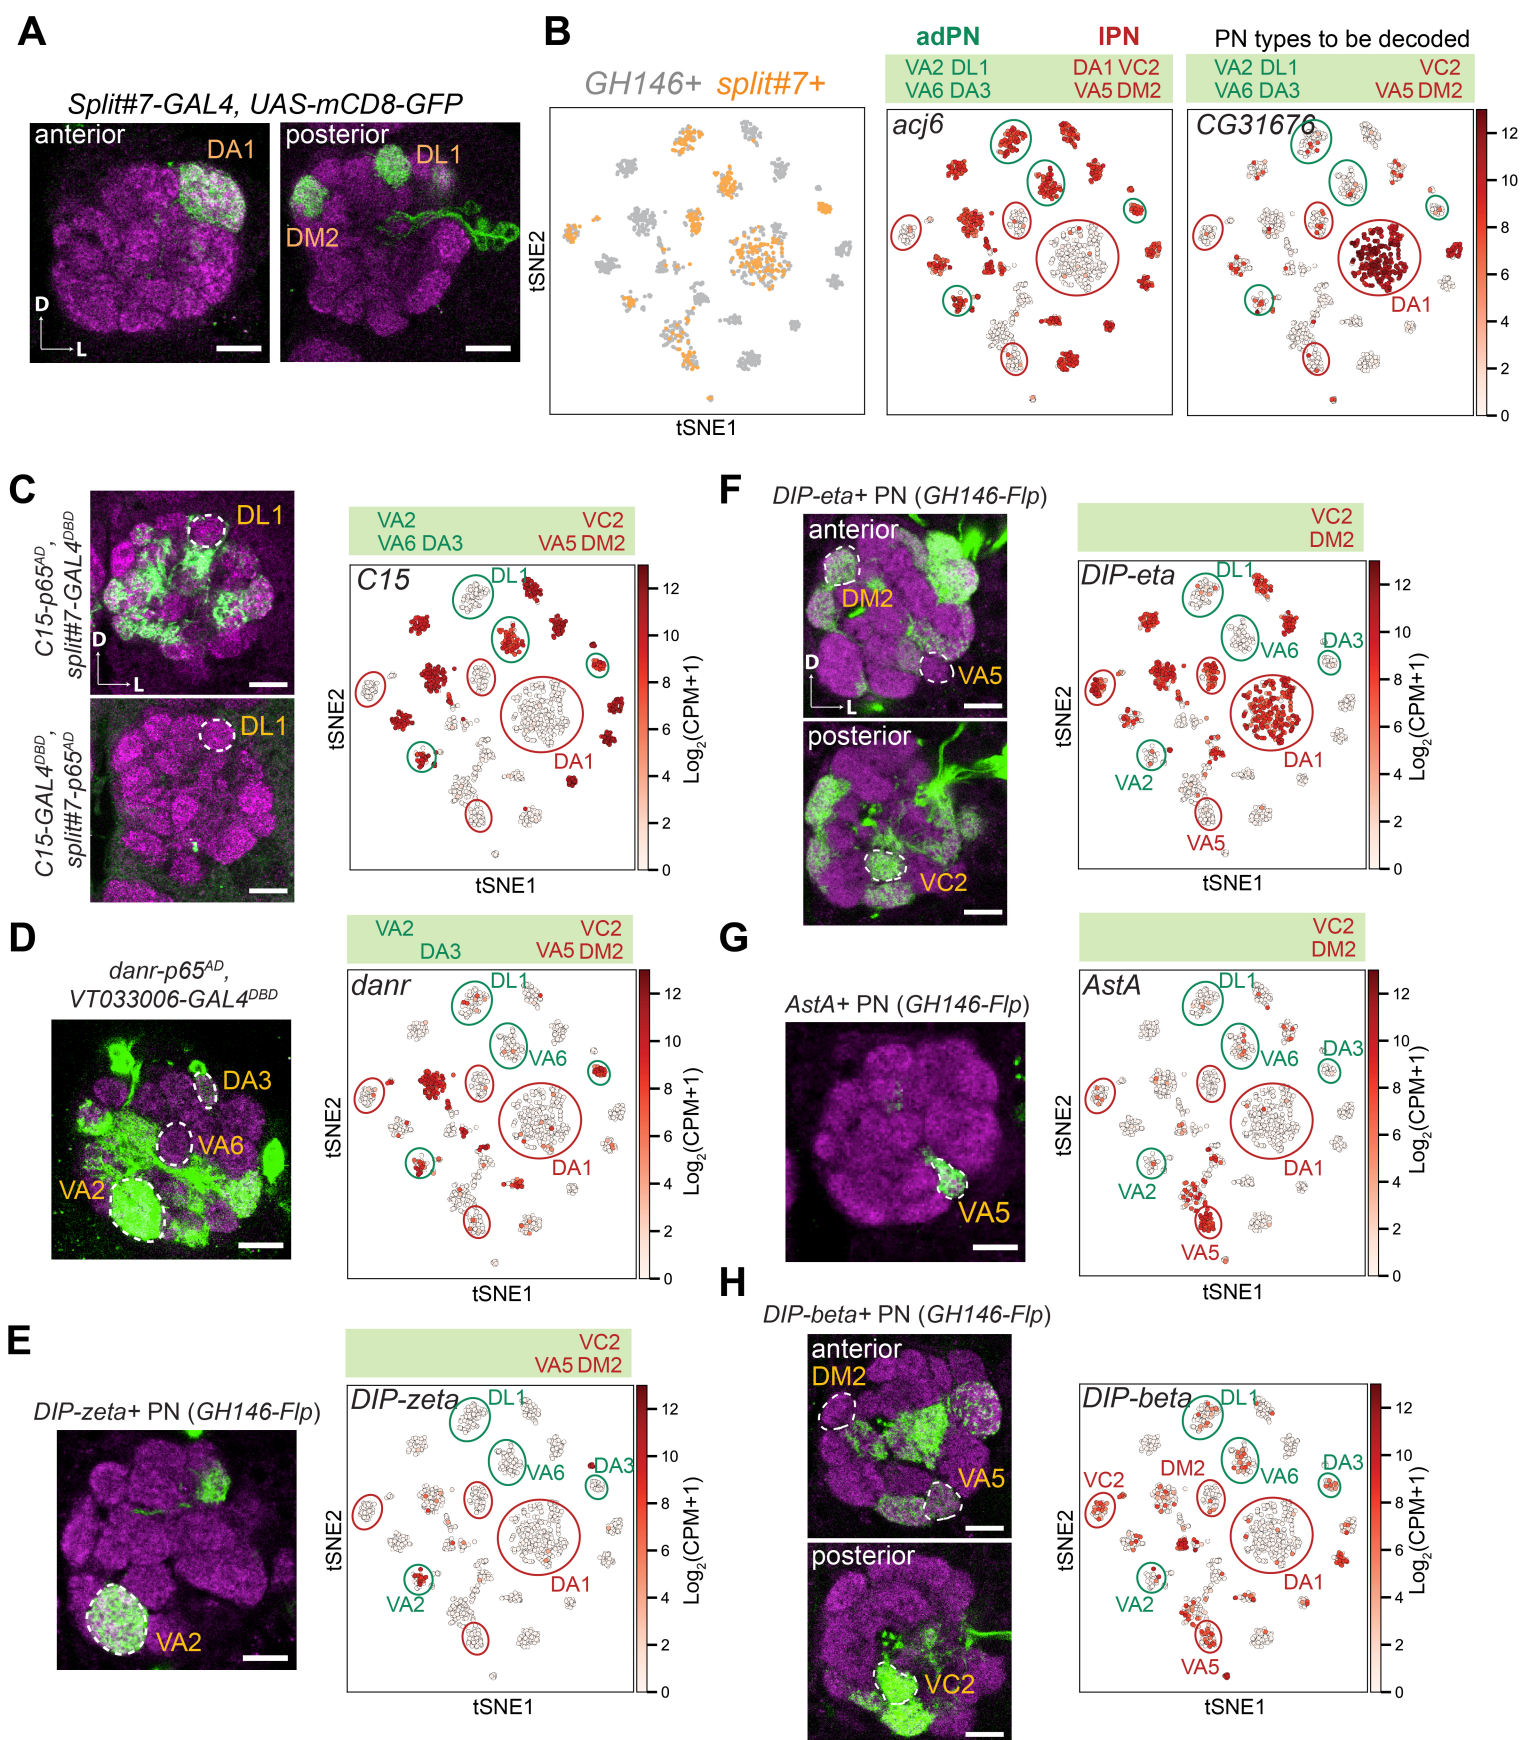

Supplement: supp [file elife-63450-supp-v1.zip]

Figure 2 supplement 3

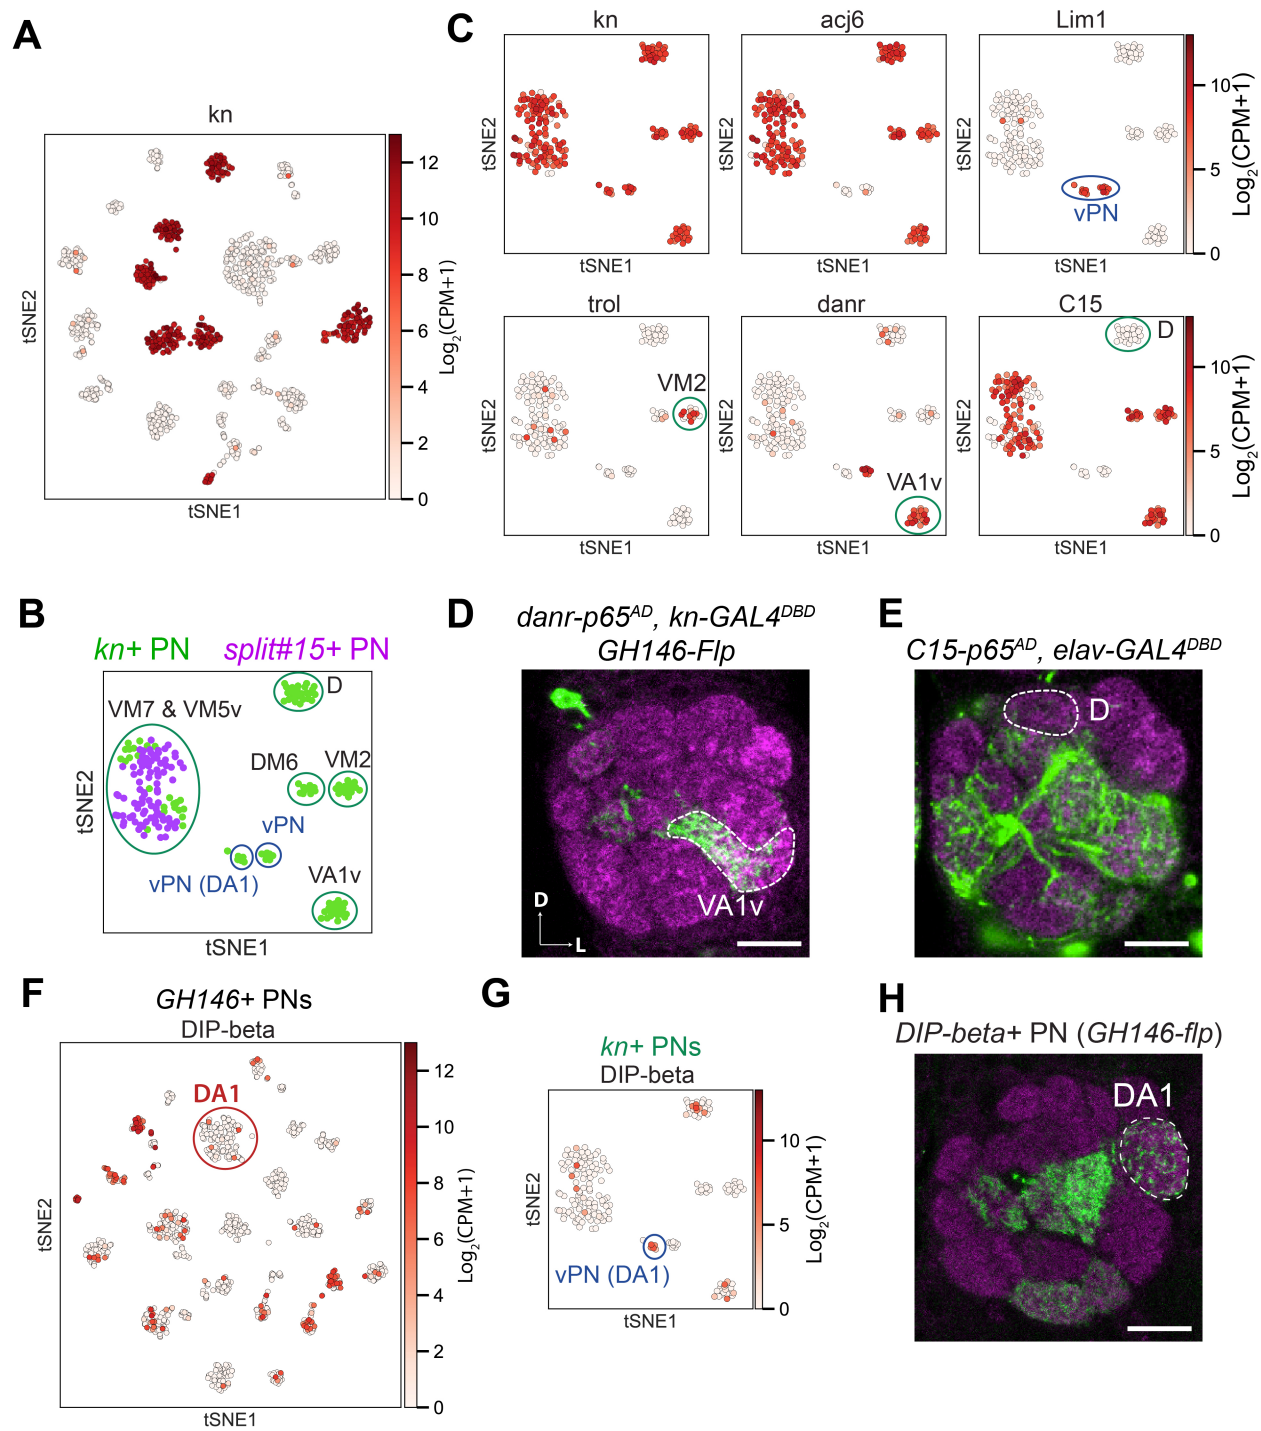

Supplement: supp [file elife-63450-supp-v1.zip]

Figure 9 supplement 2

CSMs differentially expressed in at least 1 stage

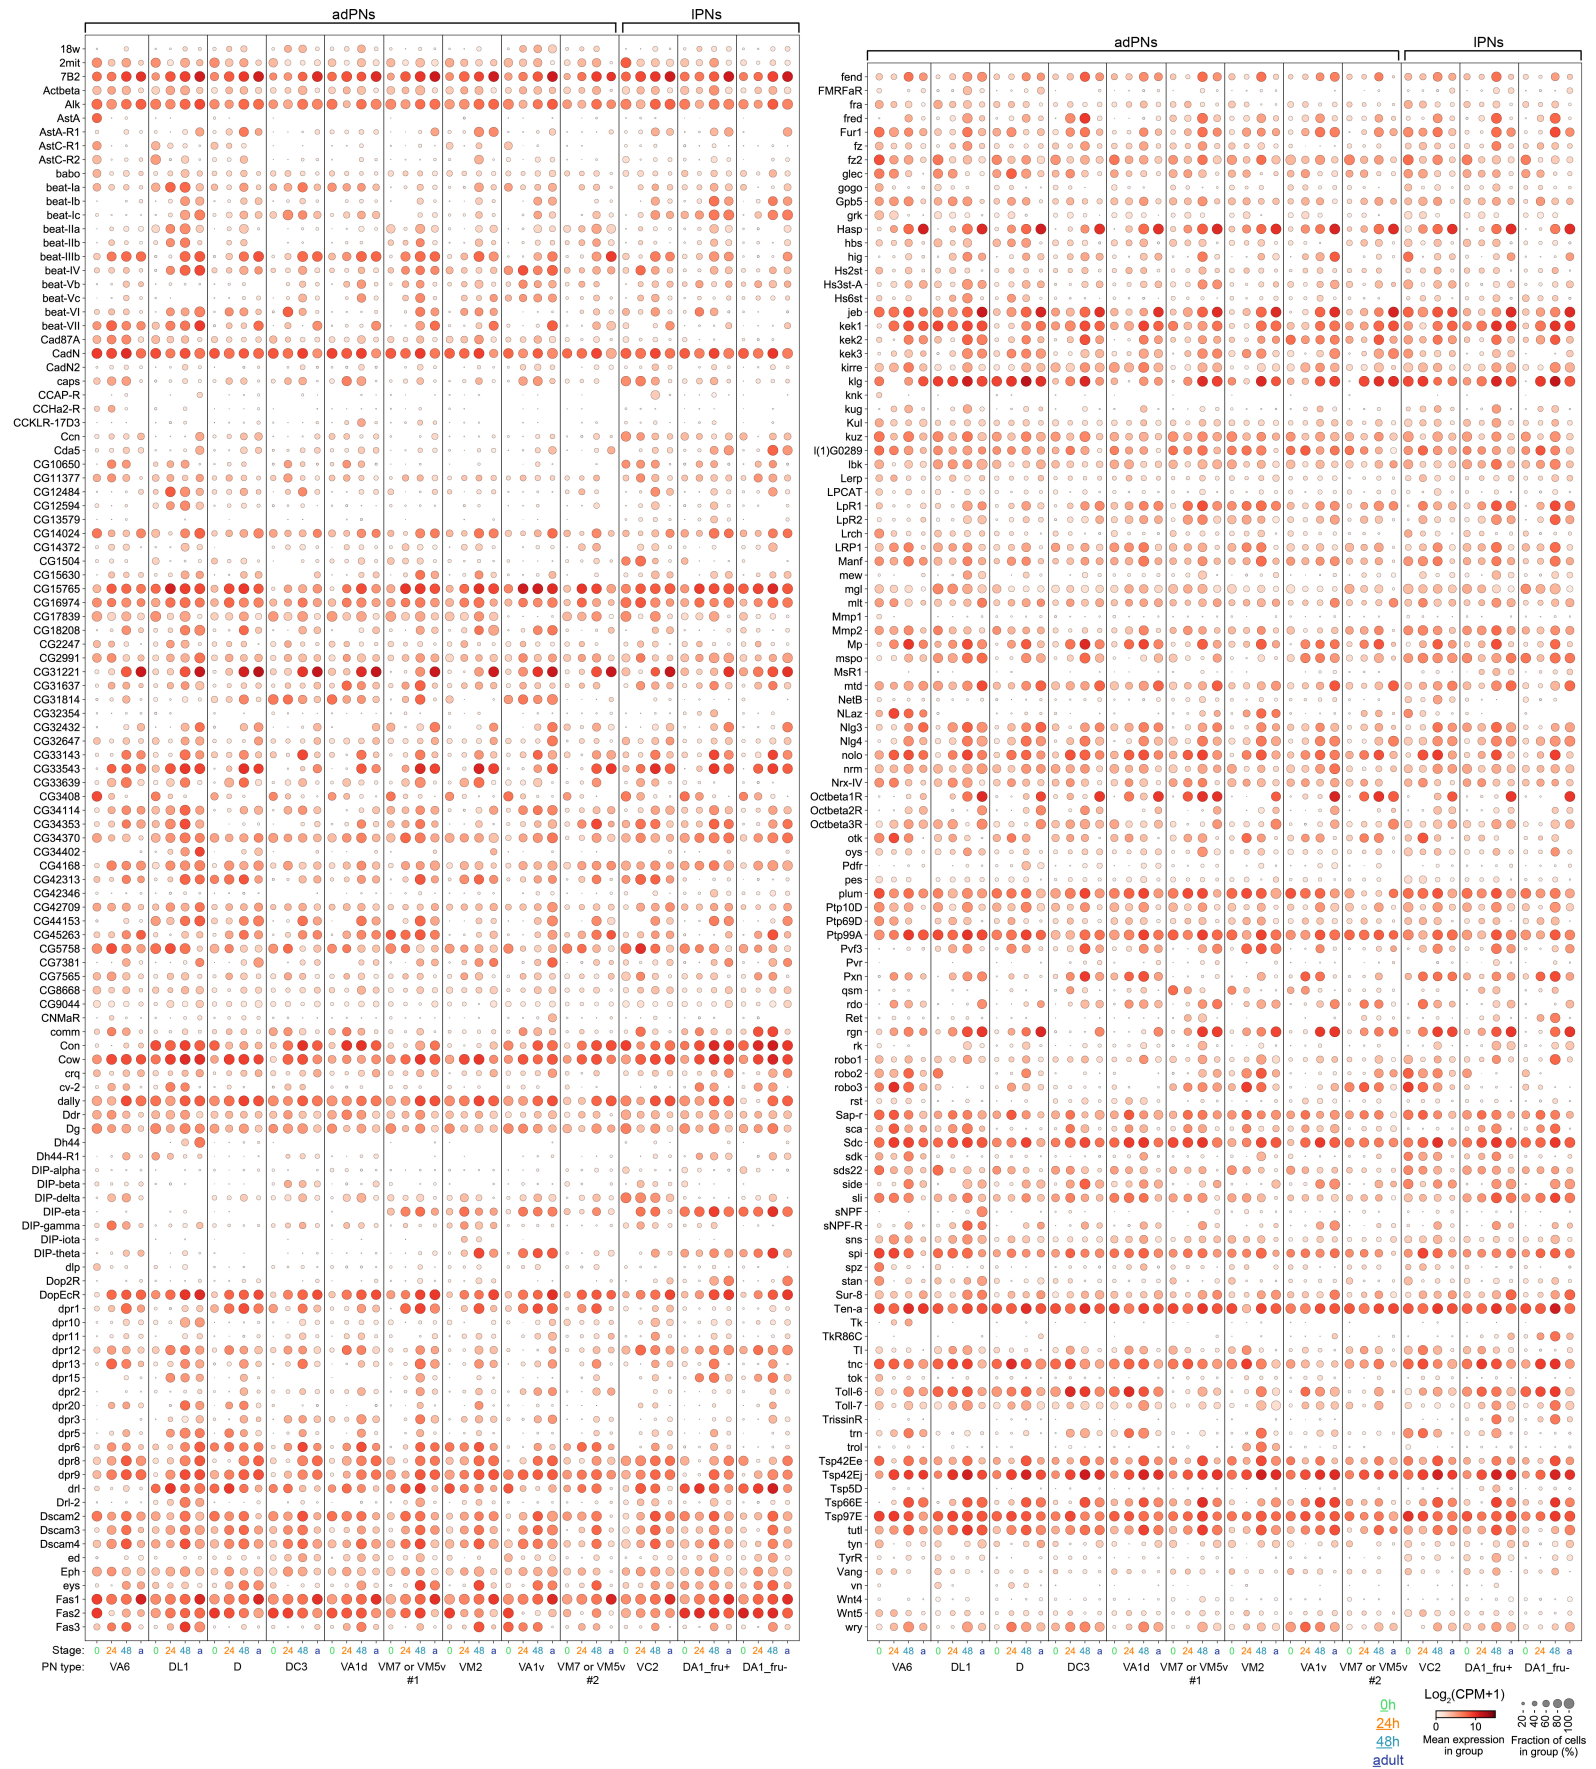

Supplement: supp [file elife-63450-supp-v1.zip]

Figure 6 supplement 1

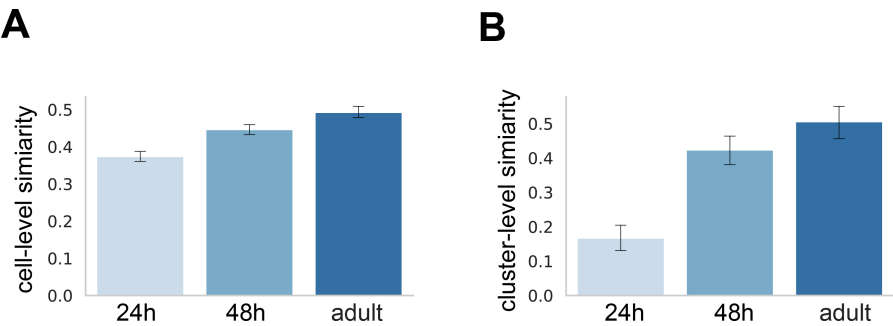

Supplement: supp [file elife-63450-supp-v1.zip]

Figure 2 supplement 1

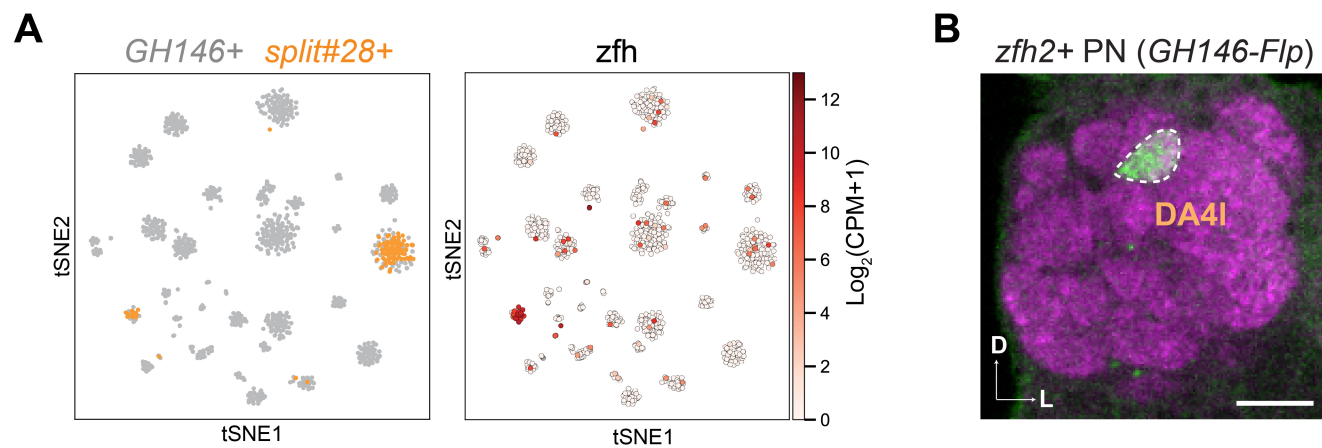

Supplement: supp [file elife-63450-supp-v1.zip]

Figure 4 supplement 2

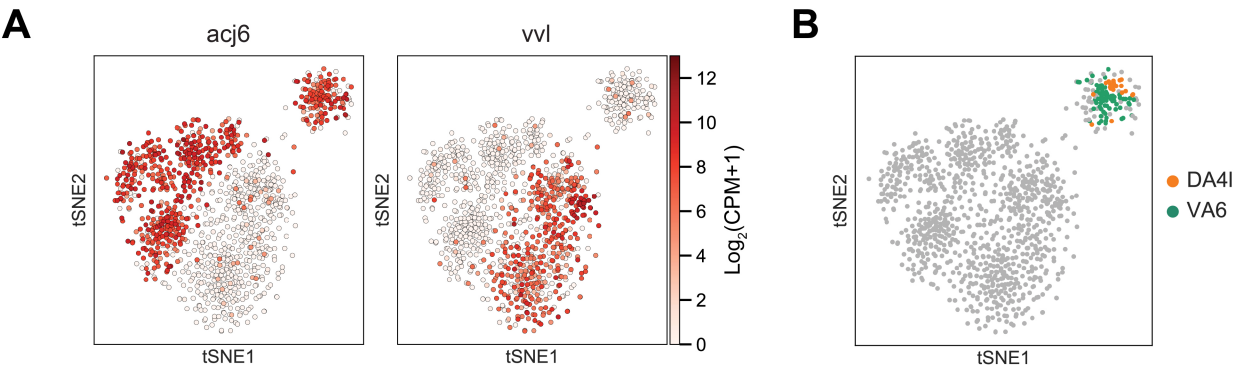

Supplement: supp [file elife-63450-supp-v1.zip]

Figure 8 supplement 1

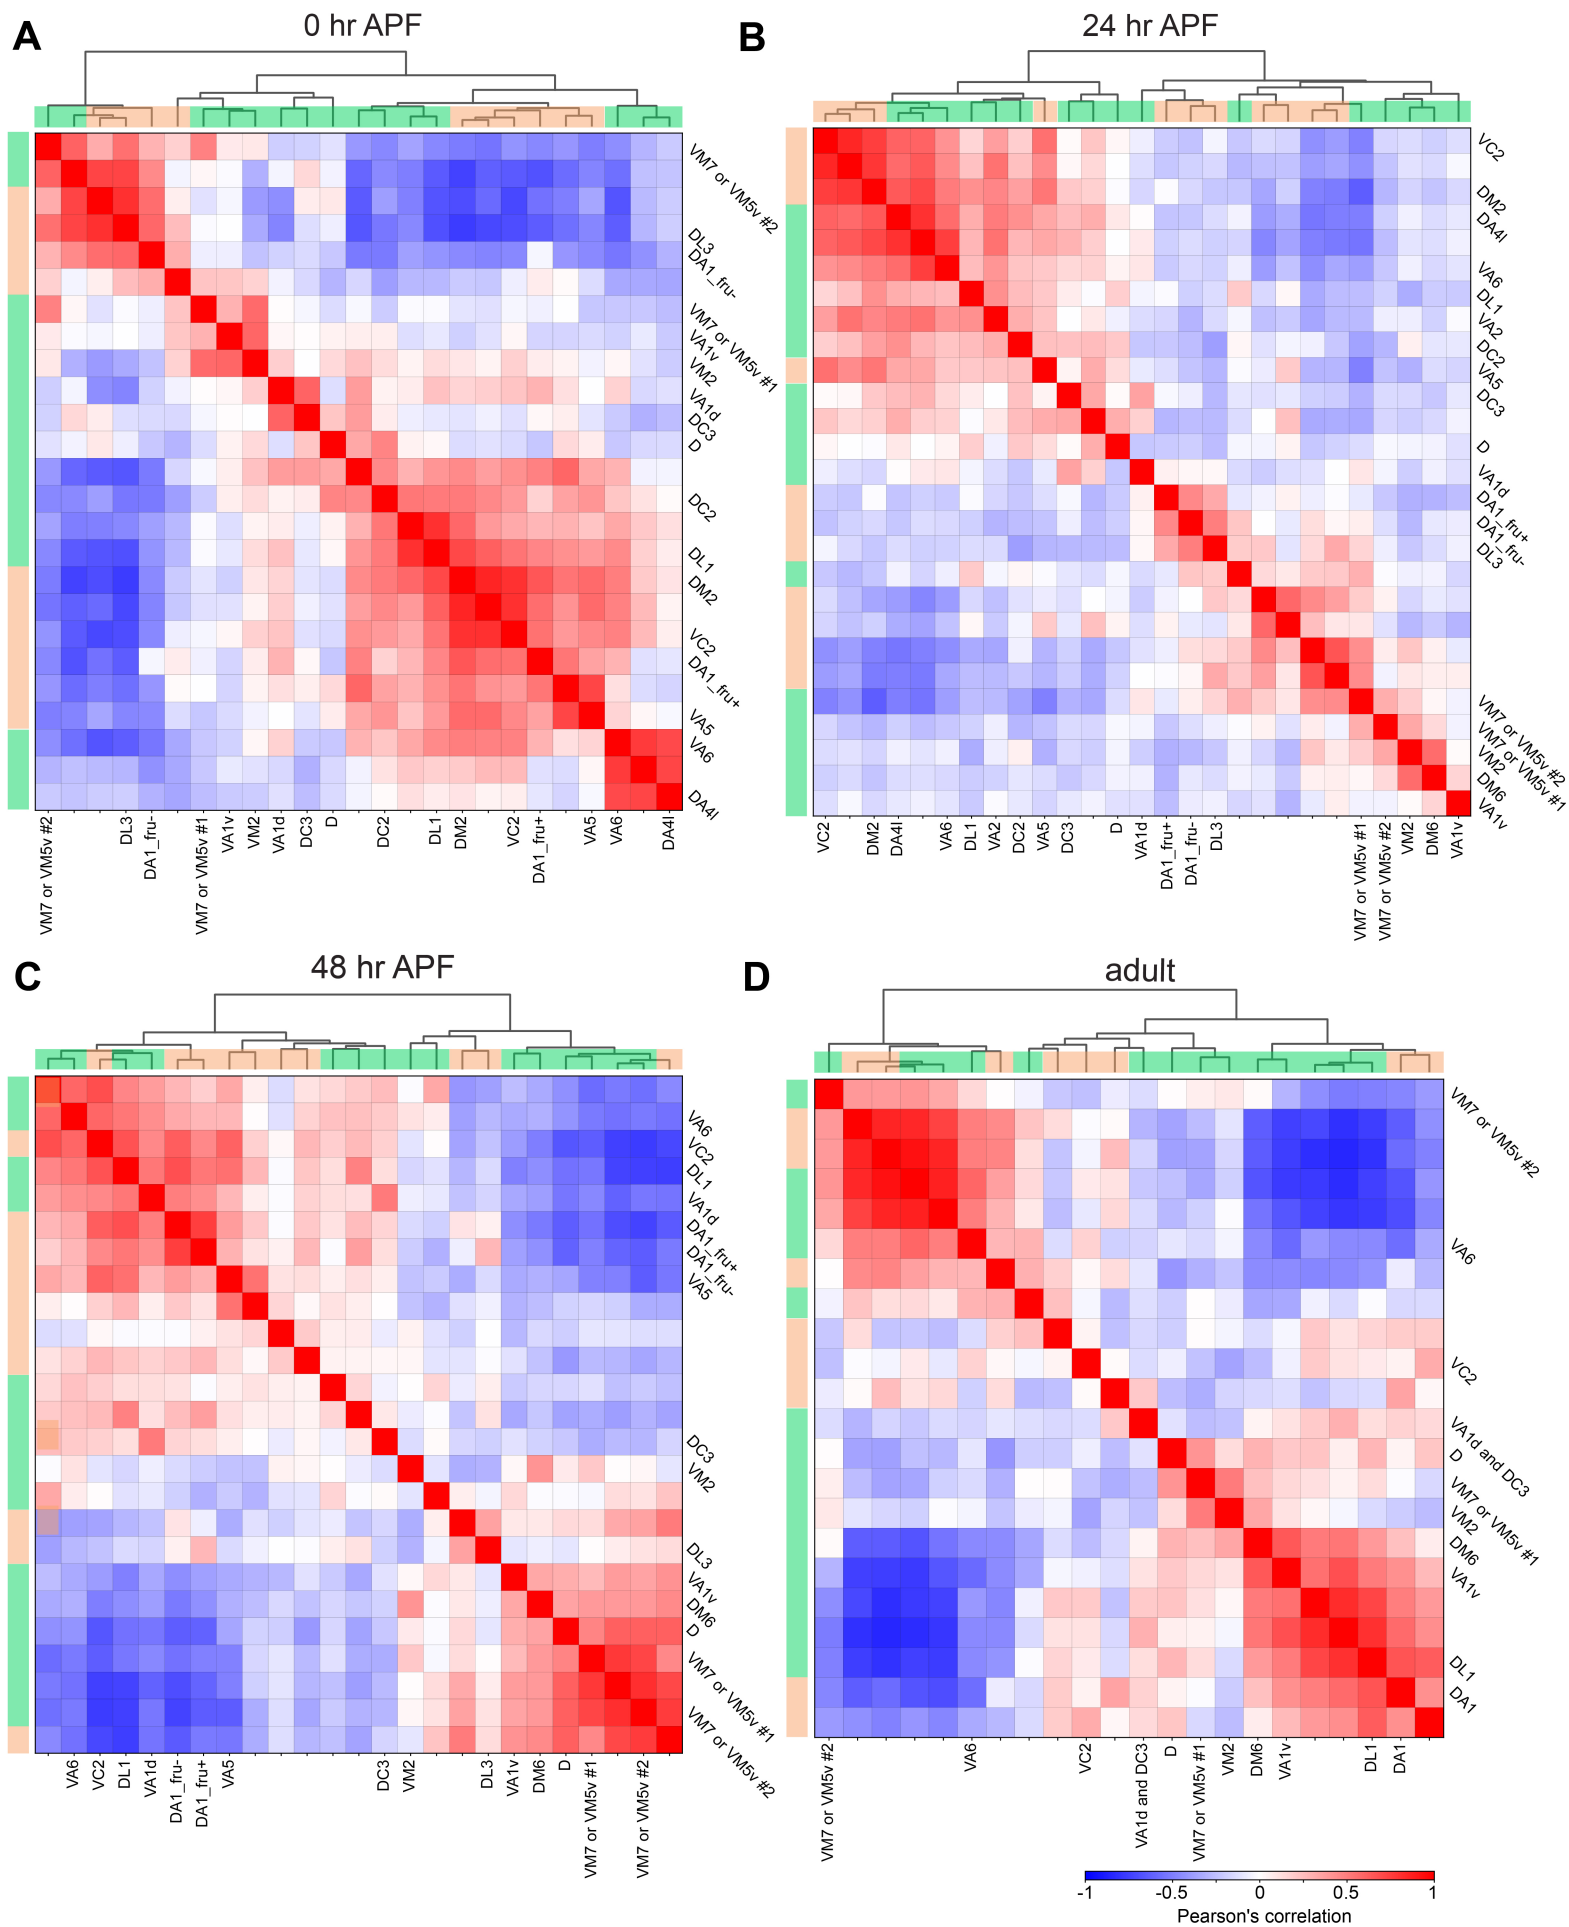

Supplement: supp [file elife-63450-supp-v1.zip]

Figure 9 Figure supplement 1

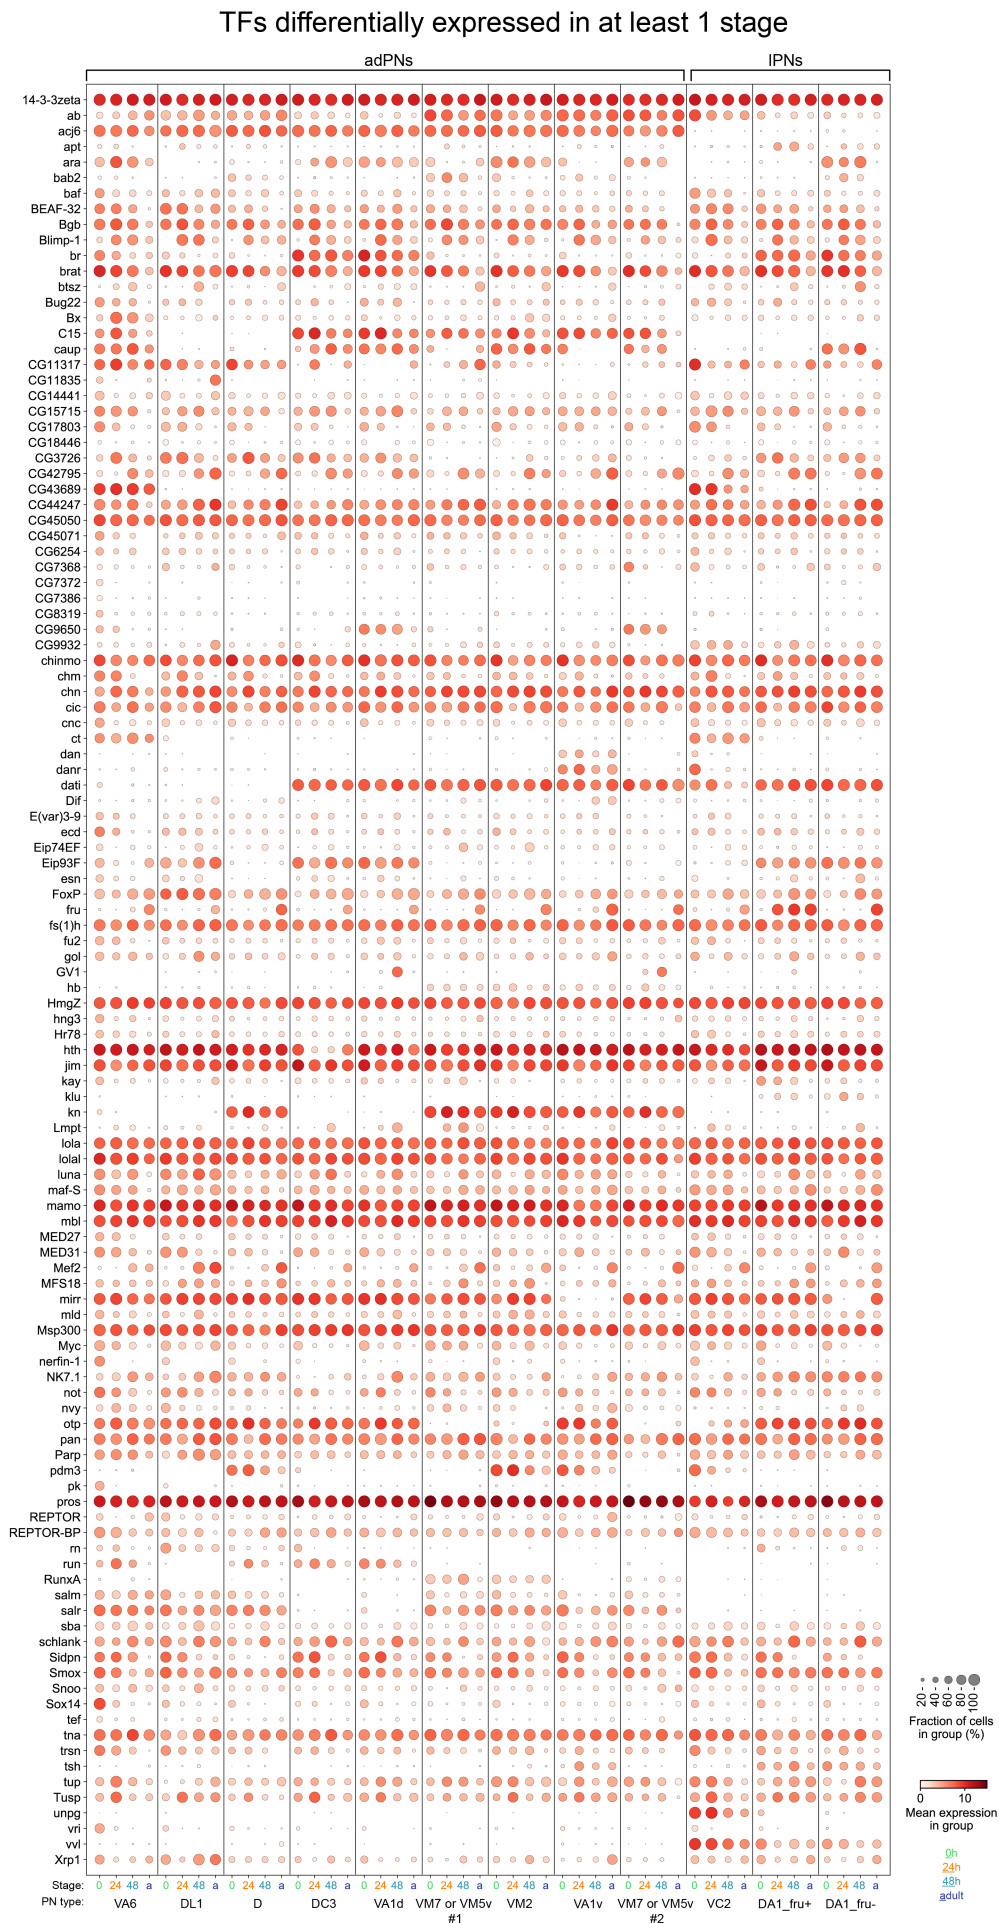

Supplement: supp [file elife-63450-supp-v1.zip]

Figure 1 supplement 1

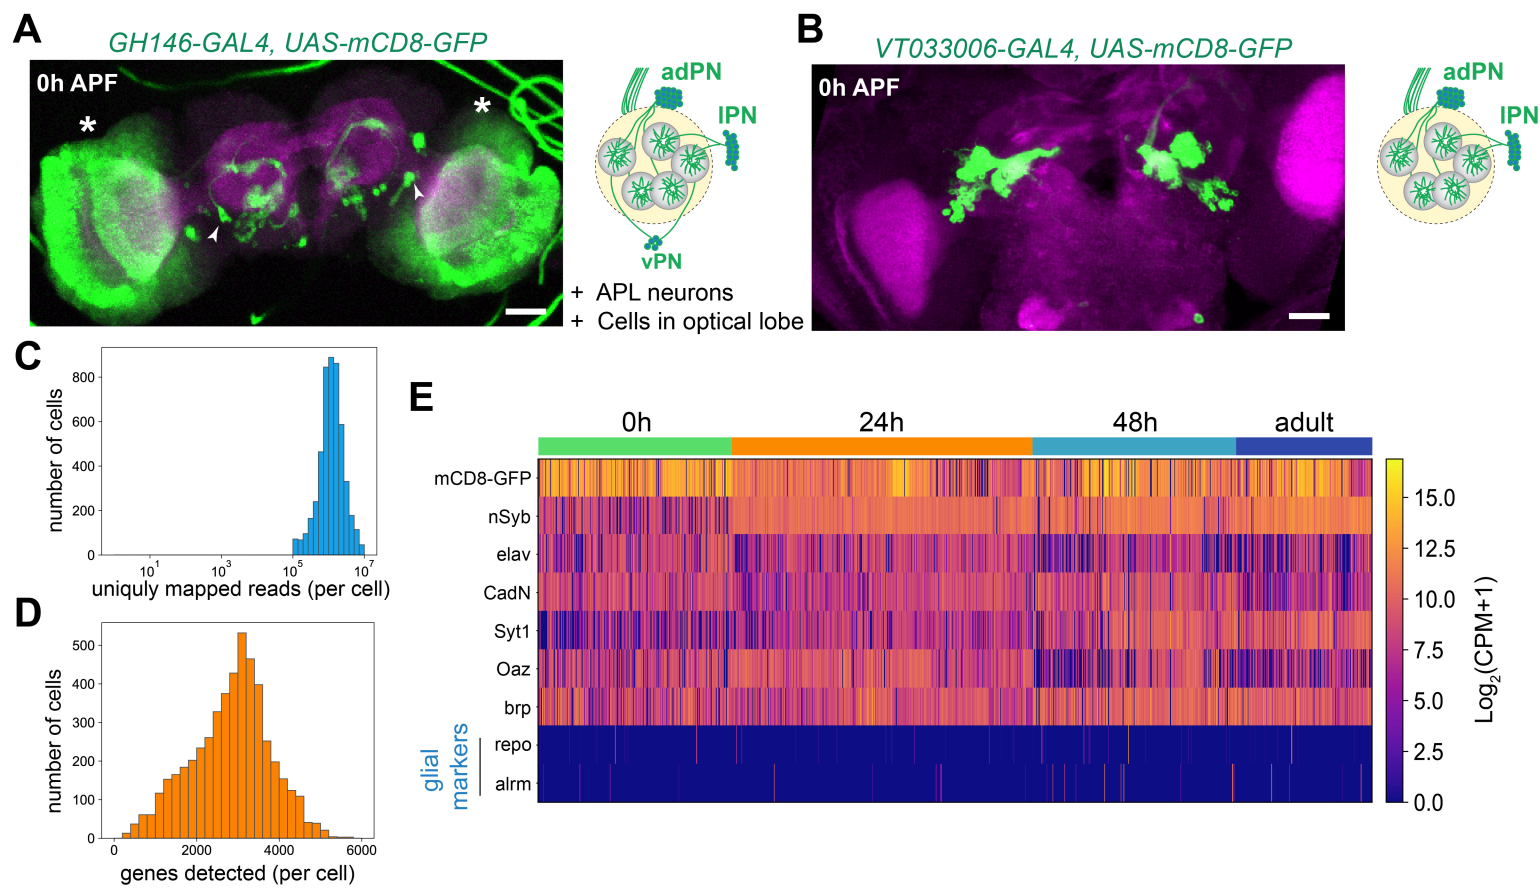

Supplement: supp [file elife-63450-supp-v1.zip]

Figure 4 supplement 1

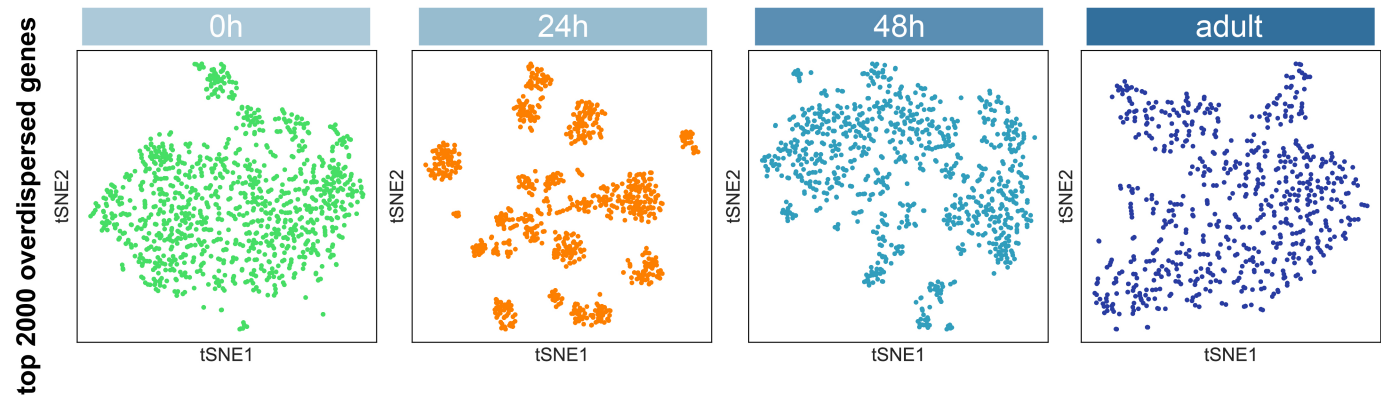

Supplement: supp [file elife-63450-supp-v1.zip]

Figure 7 supplement 1

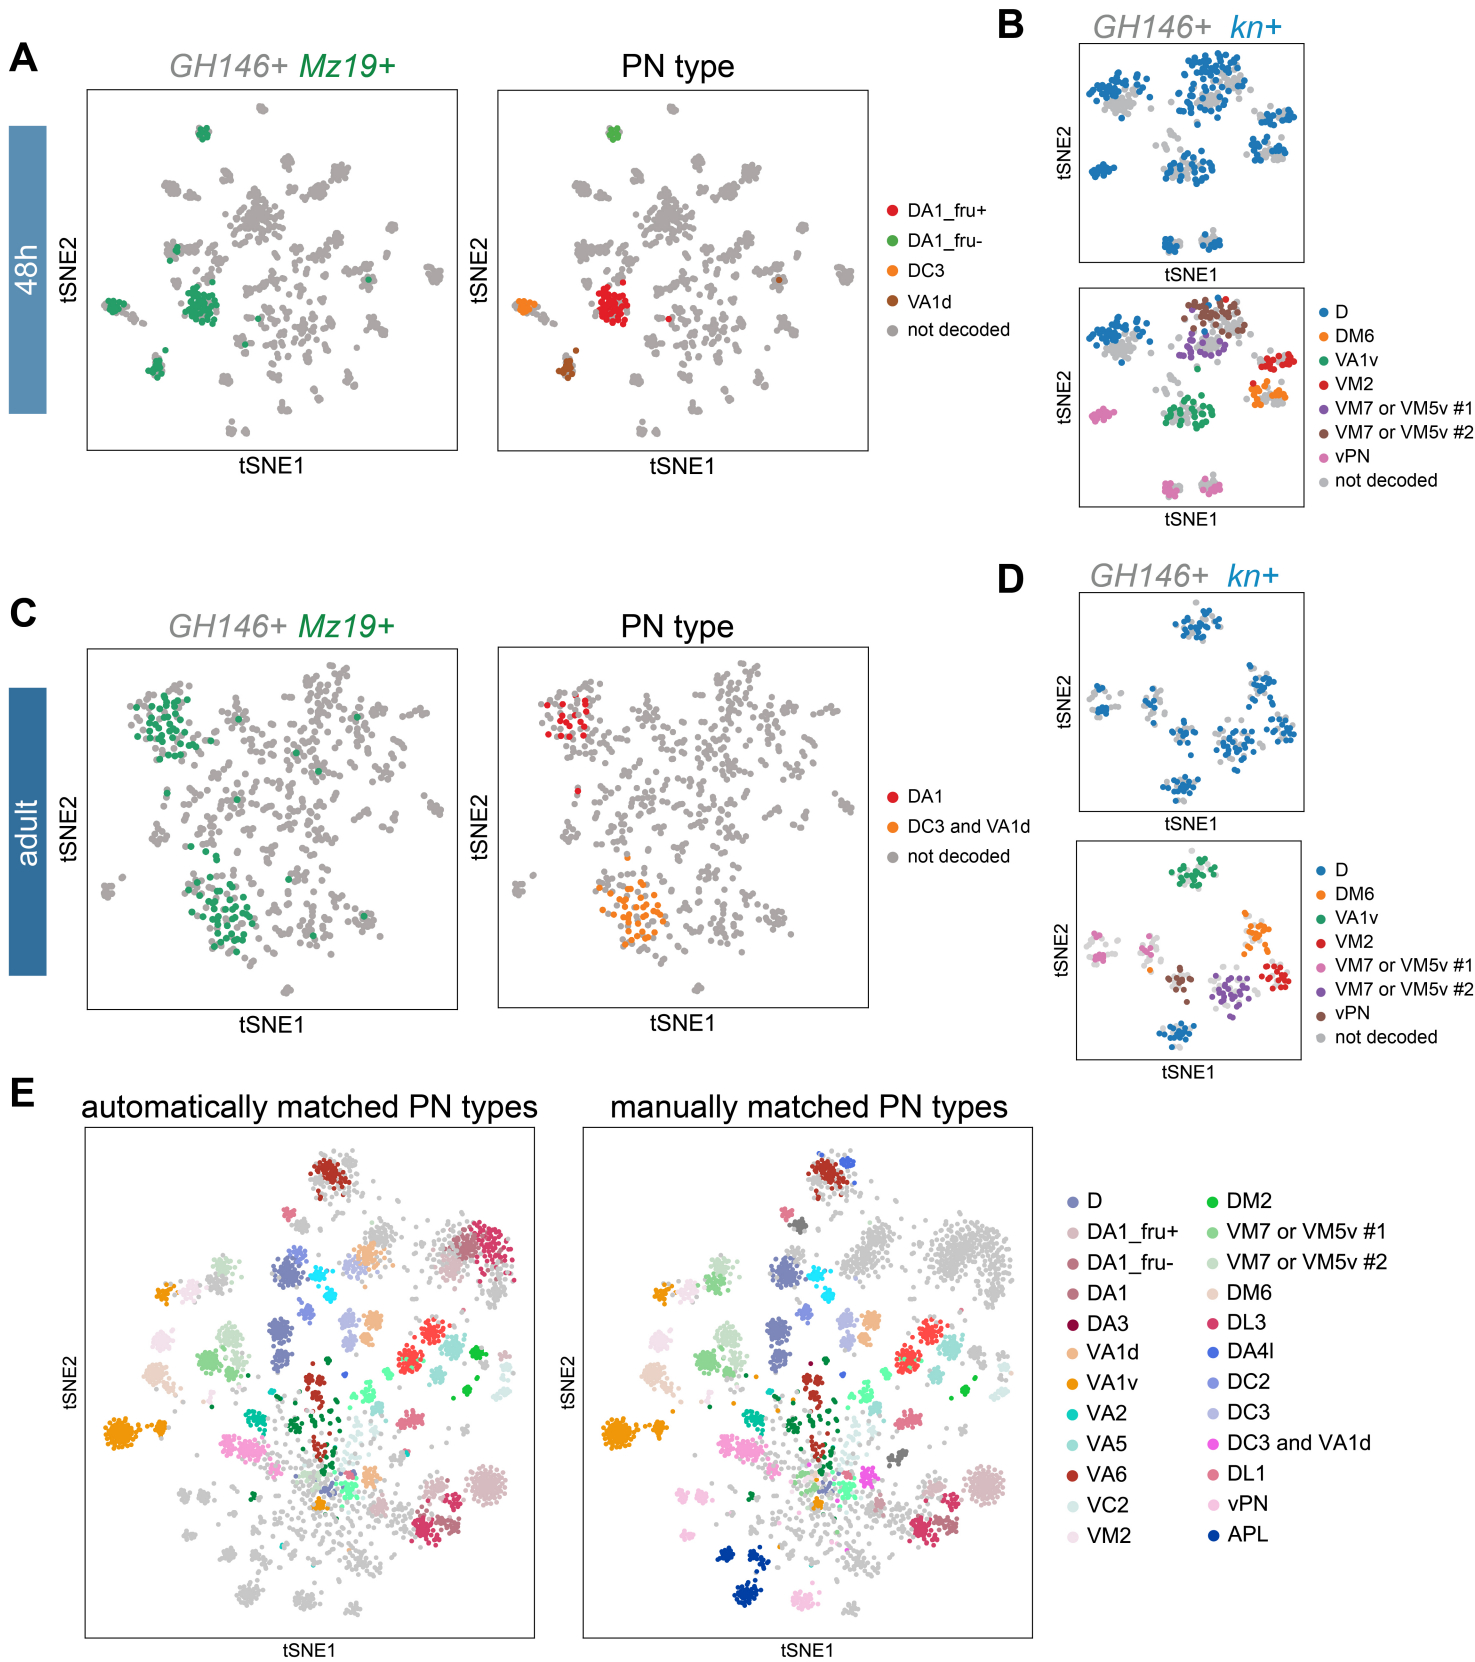

Supplement: supp [file elife-63450-supp-v1.zip]
